# Supplementary material for: Europium (III) chelate microparticle-based lateral flow immunoassay strips for rapid and quantitative detection of antibody to hepatitis B core antigen
Source: PubMed Central journal article supplement (PMC5658374; doi:10.1038/s41598-017-14427-4), 2017-10-26
Supplement: 41598_2017_14427_MOESM1_ESM.pdf [file 41598_2017_14427_MOESM1_ESM.pdf]

**Europium (III) chelate microparticle-based lateral flow immunoassay strips for rapid and quantitative detection of antibody to hepatitis B core antigen**

Rong-Liang Liang, Qiao-Ting Deng, Zhen-Hua Chen, Xu-Ping Xu, Jian-Wei Zhou,  
Jun-Yu Liang, Zhi-Ning Dong<sup>1</sup>, Tian-Cai Liu<sup>1</sup>, and Ying-Song Wu

**Supplementary Table S1**

| Sample | Proposed method<br>(IU mL <sup>-1</sup> ) | Sample | Proposed method<br>(IU mL <sup>-1</sup> ) | Sample | Proposed method<br>(IU mL <sup>-1</sup> ) |
|--------|-------------------------------------------|--------|-------------------------------------------|--------|-------------------------------------------|
| 1      | <0.31                                     | 39     | <0.31                                     | 77     | 0.63                                      |
| 2      | <0.31                                     | 40     | <0.31                                     | 78     | <0.31                                     |
| 3      | <0.31                                     | 41     | <0.31                                     | 79     | <0.31                                     |
| 4      | <0.31                                     | 42     | <0.31                                     | 80     | <0.31                                     |
| 5      | <0.31                                     | 43     | <0.31                                     | 81     | <0.31                                     |
| 6      | 0.35                                      | 44     | <0.31                                     | 82     | 0.41                                      |
| 7      | <0.31                                     | 45     | <0.31                                     | 83     | <0.31                                     |
| 8      | <0.31                                     | 46     | <0.31                                     | 84     | <0.31                                     |
| 9      | <0.31                                     | 47     | <0.31                                     | 85     | <0.31                                     |
| 10     | <0.31                                     | 48     | 0.46                                      | 86     | <0.31                                     |
| 11     | <0.31                                     | 49     | <0.31                                     | 87     | <0.31                                     |
| 12     | <0.31                                     | 50     | <0.31                                     | 88     | <0.31                                     |
| 13     | 0.93                                      | 51     | <0.31                                     | 89     | <0.31                                     |
| 14     | <0.31                                     | 52     | <0.31                                     | 90     | 1.66                                      |
| 15     | <0.31                                     | 53     | 0.98                                      | 91     | <0.31                                     |
| 16     | <0.31                                     | 54     | <0.31                                     | 92     | <0.31                                     |
| 17     | <0.31                                     | 55     | <0.31                                     | 93     | <0.31                                     |
| 18     | <0.31                                     | 56     | <0.31                                     | 94     | <0.31                                     |
| 19     | <0.31                                     | 57     | <0.31                                     | 95     | <0.31                                     |
| 20     | 1.34                                      | 58     | 1                                         | 96     | <0.31                                     |
| 21     | <0.31                                     | 59     | <0.31                                     | 97     | <0.31                                     |
| 22     | <0.31                                     | 60     | <0.31                                     | 98     | 0.79                                      |
| 23     | <0.31                                     | 61     | <0.31                                     | 99     | <0.31                                     |
| 24     | <0.31                                     | 62     | <0.31                                     | 100    | <0.31                                     |
| 25     | <0.31                                     | 63     | 1.16                                      | 101    | <0.31                                     |
| 26     | <0.31                                     | 64     | 0.84                                      | 102    | <0.31                                     |

|    |       |    |       |     |       |
|----|-------|----|-------|-----|-------|
| 27 | 0.57  | 65 | <0.31 | 103 | 1.83  |
| 28 | <0.31 | 66 | <0.31 | 104 | <0.31 |
| 29 | <0.31 | 67 | <0.31 | 105 | <0.31 |
| 30 | <0.31 | 68 | <0.31 | 106 | <0.31 |
| 31 | 1.25  | 69 | <0.31 | 107 | <0.31 |
| 32 | <0.31 | 70 | <0.31 | 108 | <0.31 |
| 33 | <0.31 | 71 | 0.38  | 109 | 0.42  |
| 34 | <0.31 | 72 | <0.31 | 110 | <0.31 |
| 35 | <0.31 | 73 | <0.31 | 111 | <0.31 |
| 36 | 0.42  | 74 | <0.31 | 112 | <0.31 |
| 37 | <0.31 | 75 | <0.31 |     |       |
| 38 | 0.78  | 76 | <0.31 |     |       |

**Supplementary Table S2**

| Sample | CMIA     | Proposed method<br>(IU mL <sup>-1</sup> ) | Sample | CMIA     | Proposed method<br>(IU mL <sup>-1</sup> ) |
|--------|----------|-------------------------------------------|--------|----------|-------------------------------------------|
| 113    | Negative | <0.31                                     | 229    | Negative | <0.31                                     |
| 114    | Negative | <0.31                                     | 230    | Negative | <0.31                                     |
| 115    | Negative | <0.31                                     | 231    | Negative | 2.14                                      |
| 116    | Negative | <0.31                                     | 232    | Negative | <0.31                                     |
| 117    | Negative | <0.31                                     | 233    | Negative | <0.31                                     |
| 118    | Negative | <0.31                                     | 234    | Negative | <0.31                                     |
| 119    | Negative | <0.31                                     | 235    | Positive | 18763.05                                  |
| 120    | Positive | 11234.02                                  | 236    | Negative | <0.31                                     |
| 121    | Negative | <0.31                                     | 237    | Negative | <0.31                                     |
| 122    | Negative | 1.26                                      | 238    | Negative | <0.31                                     |
| 123    | Negative | <0.31                                     | 239    | Negative | <0.31                                     |
| 124    | Negative | <0.31                                     | 240    | Negative | <0.31                                     |
| 125    | Negative | <0.31                                     | 241    | Negative | <0.31                                     |
| 126    | Negative | <0.31                                     | 242    | Negative | <0.31                                     |
| 127    | Negative | <0.31                                     | 243    | Negative | <0.31                                     |
| 128    | Positive | 973.02                                    | 244    | Negative | <0.31                                     |
| 129    | Negative | <0.31                                     | 245    | Negative | <0.31                                     |
| 130    | Negative | <0.31                                     | 246    | Negative | <0.31                                     |
| 131    | Negative | <0.31                                     | 247    | Positive | 3859.47                                   |
| 132    | Positive | 33000.01                                  | 248    | Positive | 1081.70                                   |
| 133    | Positive | 5.70                                      | 249    | Positive | 6687.49                                   |

|     |          |          |     |          |          |
|-----|----------|----------|-----|----------|----------|
| 134 | Negative | <0.31    | 250 | Positive | 7101.71  |
| 135 | Negative | <0.31    | 251 | Positive | 6245.09  |
| 136 | Negative | <0.31    | 252 | Positive | 8365.35  |
| 137 | Negative | 3.11     | 253 | Positive | 325.44   |
| 138 | Negative | <0.31    | 254 | Positive | 5351.60  |
| 139 | Negative | <0.31    | 255 | Positive | 9286.54  |
| 140 | Negative | <0.31    | 256 | Positive | 6624.88  |
| 141 | Negative | <0.31    | 257 | Positive | 1846.23  |
| 142 | Positive | 15.03    | 258 | Positive | 905.18   |
| 143 | Negative | <0.31    | 259 | Positive | 5625.88  |
| 144 | Negative | <0.31    | 260 | Positive | 14652.31 |
| 145 | Negative | <0.31    | 261 | Positive | 718.32   |
| 146 | Negative | <0.31    | 262 | Positive | 241.41   |
| 147 | Negative | <0.31    | 263 | Positive | 5206.67  |
| 148 | Negative | <0.31    | 264 | Positive | 1069.17  |
| 149 | Negative | <0.31    | 265 | Positive | 888.03   |
| 150 | Negative | <0.31    | 266 | Positive | 8612.87  |
| 151 | Negative | <0.31    | 267 | Positive | 29582.57 |
| 152 | Negative | <0.31    | 268 | Positive | 19206.52 |
| 153 | Negative | <0.31    | 269 | Positive | 7985.86  |
| 154 | Negative | <0.31    | 270 | Positive | 10016.34 |
| 155 | Negative | <0.31    | 271 | Positive | 888.03   |
| 156 | Negative | <0.31    | 272 | Positive | 1563.22  |
| 157 | Negative | <0.31    | 273 | Positive | 25.84    |
| 158 | Negative | <0.31    | 274 | Positive | 365.64   |
| 159 | Negative | 2.61     | 275 | Positive | 5329.26  |
| 160 | Positive | 39000.10 | 276 | Positive | 1778.07  |
| 161 | Negative | <0.31    | 277 | Positive | 1161.87  |
| 162 | Negative | <0.31    | 278 | Positive | 14487.00 |
| 163 | Negative | <0.31    | 279 | Positive | 8758.00  |
| 164 | Negative | <0.31    | 280 | Positive | 19438.70 |
| 165 | Negative | <0.31    | 281 | Positive | 19318.95 |
| 166 | Negative | <0.31    | 282 | Positive | 771.41   |
| 167 | Negative | <0.31    | 283 | Positive | 1093.98  |
| 168 | Negative | <0.31    | 284 | Positive | 11524.94 |
| 169 | Negative | <0.31    | 285 | Positive | 873.56   |
| 170 | Negative | <0.31    | 286 | Positive | 7502.26  |
| 171 | Negative | <0.31    | 287 | Positive | 13242.48 |
| 172 | Negative | <0.31    | 288 | Positive | 15396.81 |
| 173 | Negative | <0.31    | 289 | Positive | 23854.97 |

|     |          |        |     |          |          |
|-----|----------|--------|-----|----------|----------|
| 174 | Negative | <0.31  | 290 | Positive | 31.52    |
| 175 | Negative | <0.31  | 291 | Positive | 572.00   |
| 176 | Positive | 102.04 | 292 | Positive | 16931.57 |
| 177 | Negative | <0.31  | 293 | Positive | 961.51   |
| 178 | Negative | <0.31  | 294 | Positive | 25147.17 |
| 179 | Negative | <0.31  | 295 | Positive | 1992.99  |
| 180 | Negative | <0.31  | 296 | Positive | 9532.43  |
| 181 | Negative | <0.31  | 297 | Positive | 409.39   |
| 182 | Negative | <0.31  | 298 | Positive | 3272.85  |
| 183 | Negative | <0.31  | 299 | Positive | 3757.80  |
| 184 | Negative | <0.31  | 300 | Positive | 19.61    |
| 185 | Negative | 1.82   | 301 | Positive | 27166.60 |
| 186 | Negative | <0.31  | 302 | Positive | 3168.19  |
| 187 | Negative | <0.31  | 303 | Positive | 3849.30  |
| 188 | Positive | 47.02  | 304 | Positive | 29104.89 |
| 189 | Negative | <0.31  | 305 | Positive | 36312.62 |
| 190 | Negative | <0.31  | 306 | Positive | 3723.47  |
| 191 | Negative | <0.31  | 307 | Positive | 26066.15 |
| 192 | Negative | <0.31  | 308 | Positive | 233.62   |
| 193 | Negative | <0.31  | 309 | Positive | 40940.60 |
| 194 | Negative | <0.31  | 310 | Positive | 3226.73  |
| 195 | Negative | <0.31  | 311 | Positive | 4374.43  |
| 196 | Negative | <0.31  | 312 | Positive | 24106.96 |
| 197 | Negative | <0.31  | 313 | Positive | 22474.89 |
| 198 | Positive | 210.01 | 314 | Positive | 1648.41  |
| 199 | Negative | <0.31  | 315 | Positive | 10719.82 |
| 200 | Negative | <0.31  | 316 | Positive | 4.50     |
| 201 | Negative | <0.31  | 317 | Positive | 248.41   |
| 202 | Negative | <0.31  | 318 | Positive | 1041.33  |
| 203 | Negative | <0.31  | 319 | Positive | 22778.96 |
| 204 | Negative | <0.31  | 320 | Positive | 1871.82  |
| 205 | Negative | <0.31  | 321 | Positive | 5007.32  |
| 206 | Negative | <0.31  | 322 | Positive | 23132.01 |
| 207 | Negative | <0.31  | 323 | Positive | 27018.71 |
| 208 | Positive | 0.92   | 324 | Positive | 15826.75 |
| 209 | Negative | <0.31  | 325 | Positive | 31446.58 |
| 210 | Negative | <0.31  | 326 | Positive | 33047.54 |
| 211 | Negative | <0.31  | 327 | Positive | 967.46   |
| 212 | Negative | <0.31  | 328 | Positive | 236.37   |
| 213 | Negative | <0.31  | 329 | Positive | 86245.69 |

|     |          |         |     |          |          |
|-----|----------|---------|-----|----------|----------|
| 214 | Negative | <0.31   | 330 | Positive | 1743.80  |
| 215 | Negative | <0.31   | 331 | Positive | 8728.72  |
| 216 | Positive | 1302.03 | 332 | Positive | 29875.46 |
| 217 | Negative | <0.31   | 333 | Positive | 29541.85 |
| 218 | Negative | <0.31   | 334 | Positive | 514.96   |
| 219 | Negative | <0.31   | 335 | Positive | 45754.15 |
| 220 | Negative | <0.31   | 336 | Positive | 13797.61 |
| 221 | Negative | <0.31   | 337 | Positive | 39197.91 |
| 222 | Negative | <0.31   | 338 | Positive | 182.09   |
| 223 | Negative | <0.31   | 339 | Positive | 1176.62  |
| 224 | Negative | <0.31   | 340 | Positive | 743.37   |
| 225 | Negative | <0.31   | 341 | Positive | 32051.95 |
| 226 | Negative | <0.31   | 342 | Positive | 32574.09 |
| 227 | Negative | <0.31   | 343 | Positive | 11434.27 |
| 228 | Negative | <0.31   |     |          |          |

**Supplementary Table S3**

| Sample | TRFIA<br>(IU mL <sup>-1</sup> ) | Proposed method<br>(IU mL <sup>-1</sup> ) | Sample | TRFIA<br>(IU mL <sup>-1</sup> ) | Proposed method<br>(IU mL <sup>-1</sup> ) |
|--------|---------------------------------|-------------------------------------------|--------|---------------------------------|-------------------------------------------|
| 120    | 8937                            | 11234.02                                  | 290    | 110                             | 31.52                                     |
| 128    | 1399                            | 973.02                                    | 291    | 1040                            | 572.00                                    |
| 132    | 53000                           | 33000.01                                  | 292    | 32800                           | 16931.57                                  |
| 133    | 3.4                             | 5.7                                       | 293    | 1090                            | 961.51                                    |
| 142    | 12                              | 15.03                                     | 294    | 38800                           | 25147.17                                  |
| 160    | 45000                           | 39000.1                                   | 295    | 1650                            | 1992.99                                   |
| 176    | 87                              | 102.01                                    | 296    | 15400                           | 9532.43                                   |
| 188    | 56                              | 47.02                                     | 297    | 420                             | 409.39                                    |
| 198    | 157                             | 210.01                                    | 298    | 4000                            | 3272.85                                   |
| 216    | 2005                            | 1302.03                                   | 299    | 1800                            | 3757.80                                   |
| 235    | 25643                           | 18763.05                                  | 300    | 36                              | 19.61                                     |
| 247    | 1820                            | 3859.47                                   | 301    | 30700                           | 27166.60                                  |
| 248    | 1020                            | 1081.70                                   | 302    | 3020                            | 3168.19                                   |
| 249    | 5100                            | 6687.49                                   | 303    | 3050                            | 3849.30                                   |
| 250    | 3060                            | 7101.71                                   | 304    | 23100                           | 29104.89                                  |

|     |       |          |     |       |          |
|-----|-------|----------|-----|-------|----------|
| 251 | 4740  | 6245.09  | 305 | 40800 | 36312.62 |
| 252 | 21500 | 8365.35  | 306 | 3640  | 3723.47  |
| 253 | 940   | 325.44   | 307 | 38300 | 26066.15 |
| 254 | 3300  | 5351.60  | 308 | 430   | 233.62   |
| 255 | 13800 | 9286.54  | 309 | 39700 | 40940.60 |
| 256 | 7200  | 6624.88  | 310 | 4620  | 3226.73  |
| 257 | 2980  | 1846.23  | 311 | 4190  | 4374.43  |
| 258 | 1150  | 905.18   | 312 | 21600 | 24106.96 |
| 259 | 13300 | 5625.88  | 313 | 39200 | 22474.89 |
| 260 | 22100 | 14652.31 | 314 | 1520  | 1648.41  |
| 261 | 830   | 718.32   | 315 | 22700 | 10719.82 |
| 262 | 640   | 241.41   | 316 | 1.5   | 4.50     |
| 263 | 3620  | 5206.67  | 317 | 430   | 248.41   |
| 264 | 1440  | 1069.17  | 318 | 1710  | 1041.33  |
| 265 | 1390  | 888.03   | 319 | 28400 | 22778.96 |
| 266 | 24100 | 8612.87  | 320 | 1830  | 1871.82  |
| 267 | 40800 | 29582.57 | 321 | 3640  | 5007.32  |
| 268 | 18900 | 19206.52 | 322 | 37100 | 23132.01 |
| 269 | 9200  | 7985.86  | 323 | 28000 | 27018.71 |
| 270 | 14300 | 10016.34 | 324 | 23300 | 15826.75 |
| 271 | 540   | 888.03   | 325 | 39600 | 31446.58 |
| 272 | 3840  | 1563.22  | 326 | 35700 | 33047.54 |
| 273 | 14.4  | 25.84    | 327 | 440   | 967.46   |
| 274 | 1070  | 365.64   | 328 | 390   | 236.37   |
| 275 | 3780  | 5329.26  | 329 | 96300 | 86245.69 |
| 276 | 1200  | 1778.07  | 330 | 720   | 1743.80  |
| 277 | 1380  | 1161.87  | 331 | 24800 | 8728.72  |
| 278 | 25700 | 14487.00 | 332 | 25400 | 29875.46 |
| 279 | 10600 | 8758.00  | 333 | 39800 | 29541.85 |
| 280 | 25500 | 19438.70 | 334 | 840   | 514.96   |
| 281 | 28900 | 19318.95 | 335 | 54100 | 45754.15 |
| 282 | 950   | 771.41   | 336 | 12600 | 13797.61 |
| 283 | 1130  | 1093.98  | 337 | 39900 | 39197.91 |
| 284 | 13800 | 11524.94 | 338 | 370   | 182.09   |
| 285 | 1210  | 873.56   | 339 | 2830  | 1176.62  |
| 286 | 18300 | 7502.26  | 340 | 2020  | 743.37   |
| 287 | 19900 | 13242.48 | 341 | 36300 | 32051.95 |
| 288 | 24800 | 15396.81 | 342 | 39000 | 32574.09 |
| 289 | 30500 | 23854.97 | 343 | 9900  | 11434.27 |

---
